# Supplementary material
Source: PubMed Central journal article supplement (PMC3340147)
Supplement: supp_M111.309864_jbc.M111.309864-1.pdf [file supp_M111.309864_jbc.M111.309864-1.pdf]

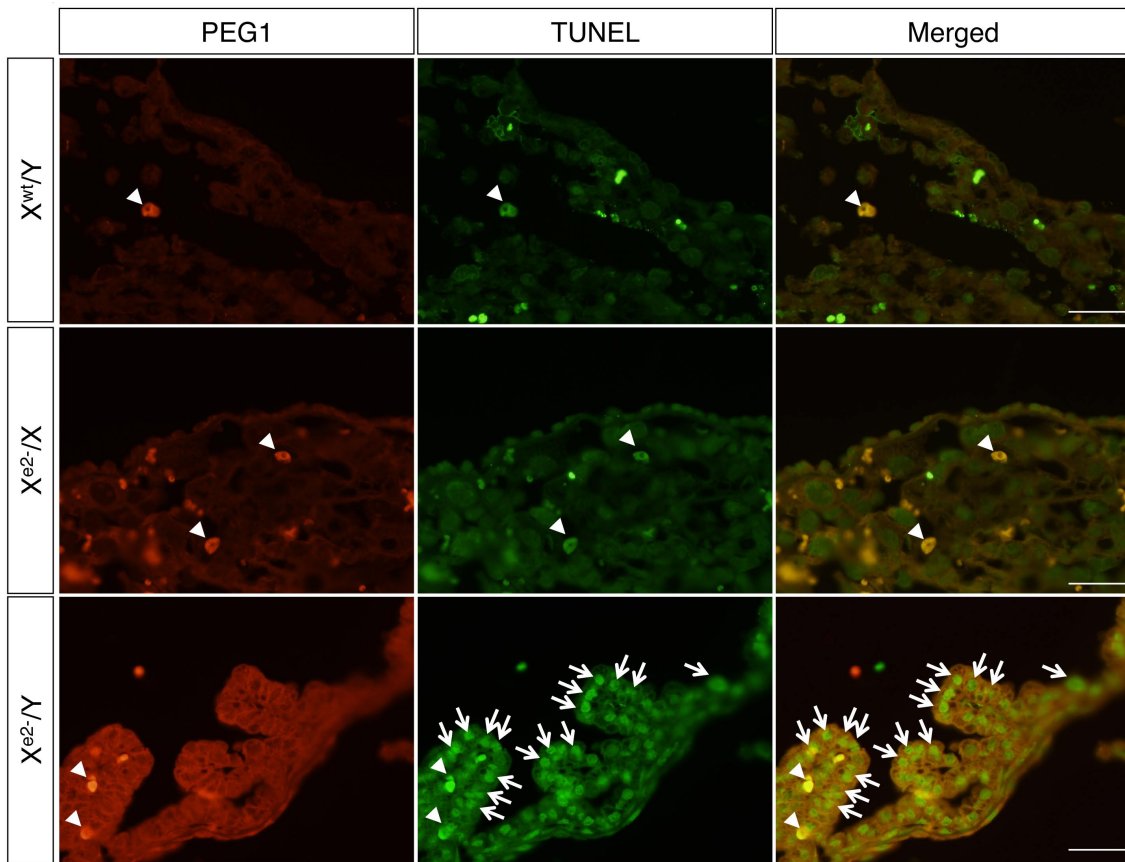

Supplementary FIGURE 1. **Apoptosis correlate with peg-1 expression in trophoblast cells.**

Placenta carrying a maternal mutant MeCP2\_e2 allele exhibit increased number of TUNEL-positive/peg1-positive trophoblast cells compared to wild type placenta (arrows).

Arrowheads show TUNEL staining in premature erythrocytes. Scale bars: 50  $\mu$ m.
